# Supplementary material
Source: publisher figshare collection journal article supplement (https://frontiersin.figshare.com/ndownloader/files/14088206)

**Supplementary Figure 1**

Distribution of sampling effort across sampling stations conducted specifically for benthic sampling in the Onagawa Bay Monthly Survey.


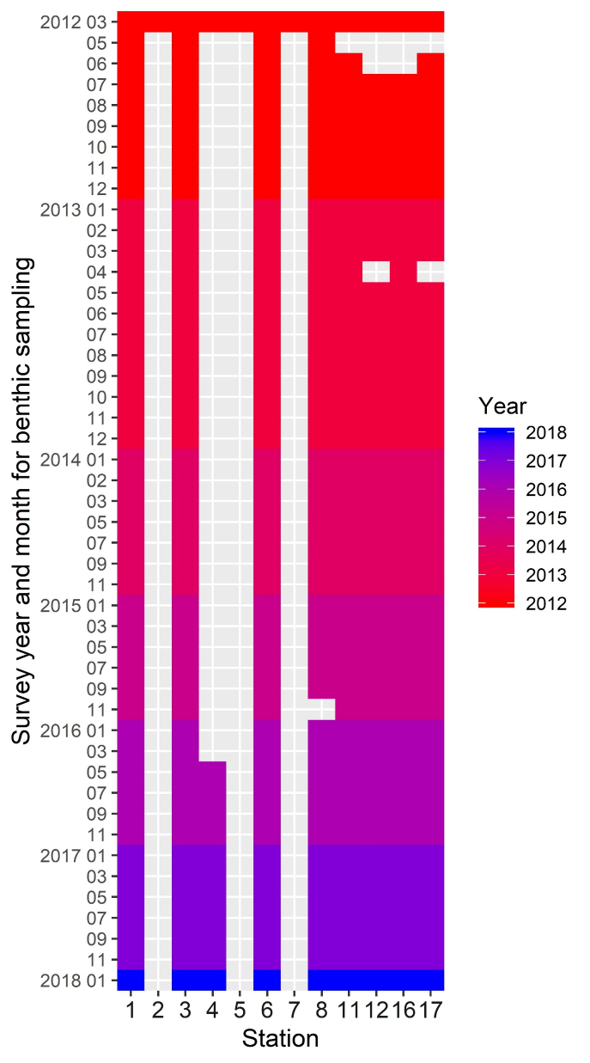

Supplement: Supplementary file 1 [file 14088206]
